# Supplementary material for: Translation and First Pilot Validation Study of the “Undergraduate Nursing Student Academic Satisfaction Scale” Questionnaire to the Spanish Context
Source: Int J Environ Res Public Health. 2021 Jan 7;18(2):423. doi: 10.3390/ijerph18020423 (PMC7825755; doi:10.3390/ijerph18020423)
Supplement: Supplementary file 1 [file ijerph-18-00423-s001.pdf]

## Supplementary Material

**Table S1.** “Escala de Satisfacción Académica del Estudiante de Enfermería” (ESAAE) scale after translation, expert committee modifications and piloting.

| <b>Subescala I: Aprendizaje en clase</b> |                                                                                                                                                                      |                       |                   |                        |                      |                          |
|------------------------------------------|----------------------------------------------------------------------------------------------------------------------------------------------------------------------|-----------------------|-------------------|------------------------|----------------------|--------------------------|
| <b>Ítem</b>                              | <b>Las siguientes preguntas están destinadas a obtener información acerca de tu experiencia de aprendizaje con el plan de estudios del grado</b>                     | <b>Muy de acuerdo</b> | <b>De acuerdo</b> | <b>Algo de Acuerdo</b> | <b>En Desacuerdo</b> | <b>Muy en desacuerdo</b> |
| 1                                        | Puedo expresar con libertad mis inquietudes académicas y de otro tipo a los profesores                                                                               |                       |                   |                        |                      |                          |
| 2                                        | Los profesores son fácilmente accesibles                                                                                                                             |                       |                   |                        |                      |                          |
| 3                                        | Los profesores se esfuerzan en comprender las dificultades de los estudiantes cuando se les pregunta                                                                 |                       |                   |                        |                      |                          |
| 4                                        | Los profesores se esfuerzan por entender las dificultades que podría tener con mi trabajo académico durante la asignatura                                            |                       |                   |                        |                      |                          |
| 5                                        | Los profesores suelen estar disponibles después de clase y durante las horas de tutoría                                                                              |                       |                   |                        |                      |                          |
| 6                                        | Puedo expresar con libertad mis inquietudes académicas y de cualquier otro tipo a la administración                                                                  |                       |                   |                        |                      |                          |
| 7                                        | El profesorado es justo e imparcial en su trato con los estudiantes                                                                                                  |                       |                   |                        |                      |                          |
| 8                                        | Los profesores proporcionan comentarios adecuados sobre el progreso de los estudiantes durante la asignatura                                                         |                       |                   |                        |                      |                          |
| 9                                        | Recibo comentarios detallados de los miembros del profesorado sobre mi trabajo y tareas escritas                                                                     |                       |                   |                        |                      |                          |
| 10                                       | Los medios para la expresión de las posibles quejas de los estudiantes son fácilmente accesibles                                                                     |                       |                   |                        |                      |                          |
| 11                                       | Los profesores son buenos modelos a seguir y me motivan para dar lo mejor de mí                                                                                      |                       |                   |                        |                      |                          |
| 12                                       | La administración muestra preocupación por los estudiantes como individuos                                                                                           |                       |                   |                        |                      |                          |
| 13                                       | Los profesores demuestran un alto nivel de conocimiento en su materia                                                                                                |                       |                   |                        |                      |                          |
| 14                                       | Los profesores se toman tiempo para escuchar/discutir los problemas que puedan afectar en mi rendimiento académico                                                   |                       |                   |                        |                      |                          |
| 15                                       | Los profesores producen una buena impresión general                                                                                                                  |                       |                   |                        |                      |                          |
| 16                                       | Generalmente me conceden tiempo suficiente para entender las cosas que debo aprender                                                                                 |                       |                   |                        |                      |                          |
| <b>Subescala II: Enseñanza clínica</b>   |                                                                                                                                                                      |                       |                   |                        |                      |                          |
| <b>Ítem</b>                              | <b>Las siguientes están destinadas a obtener información acerca de tu experiencia clínica con el plan de estudios del grado</b>                                      | <b>Muy de acuerdo</b> | <b>De acuerdo</b> | <b>Algo de Acuerdo</b> | <b>En Desacuerdo</b> | <b>Muy en desacuerdo</b> |
| 17                                       | Los tutores clínicos son cercanos y hacen que los estudiantes se sientan cómodos realizando preguntas                                                                |                       |                   |                        |                      |                          |
| 18                                       | Los tutores clínicos proporcionan comentarios en los momentos apropiados, y no me avergüenzan frente a otros (compañeros de clase, personal, pacientes y familiares) |                       |                   |                        |                      |                          |
| 19                                       | Los tutores clínicos están abiertos a los debates y la diferencia de opiniones                                                                                       |                       |                   |                        |                      |                          |
| 20                                       | Los tutores clínicos me proporcionan suficientes                                                                                                                     |                       |                   |                        |                      |                          |

- orientaciones antes de realizar competencias técnicas

22 Los tutores clínicos me dan ideas claras de lo que se espera de mí durante una rotación clínica

23 Los tutores clínicos facilitan mi capacidad de evaluar críticamente las necesidades del paciente

24 Los tutores clínicos me asignan pacientes que son apropiados para mi nivel de competencia

25 Los tutores clínicos me aportan comentarios  
verbales y escritos en lo referente a mi  
experiencia clínica

26 Los tutores clínicos demuestran un alto nivel de conocimiento y experiencia clínica

27 Los tutores clínicos están disponibles cuando los necesito

28 Los tutores clínicos brindan suficientes oportunidades para realizar una labor independiente en los talleres de simulación y en las prácticas clínicas

29 Los tutores clínicos me animan a vincular la teoría con la práctica.

Las instrucciones son coherentes entre diferentes  
30 tutores de talleres de simulación y de prácticas  
clínica

31 Los profesores se comportan de manera profesional

**Ítem** Las siguientes preguntas están destinadas a obtener información acerca de tu percepción del plan de estudios del grado y su presentación

De  
acuerdo

En  
Desacuerdo

**Muy en  
desacuerdo**

- |    |                                                                              |
|----|------------------------------------------------------------------------------|
| 32 | Este plan de estudios ofrece una variedad de asignaturas buenas y relevantes |
|----|------------------------------------------------------------------------------|

33 Este plan de estudios mejora mis competencias analíticas

34 La mayoría de las asignaturas en este plan de estudio son beneficiosas y contribuyen a mi desarrollo profesional general

35 La calidad de la instrucción que recibo en mis  
clases es buena y útil

36 Por lo general, tengo una idea clara de lo que se espera de mí en este plan de estudios

37 El plan de estudios está diseñado para facilitar el trabajo en equipo entre los estudiantes

38 El plan de estudios mejora mis habilidades de resolución de problemas o pensamiento crítico

39 Hay un compromiso con la excelencia académica  
en este plan de estudios

Como resultado de mis asignaturas, me siento  
40 seguro para tratar con mis problemas clínicos en  
enfermería

41 Ir a clase me ayuda a entender mejor el material docente

42 Cursar este plan de estudios me ha permitido experimentar un crecimiento intelectual

43 En general, los requisitos del plan de estudios son razonables y alcanzables

| Subescala IV: Apoyo y recursos |                                                                                                                                                 |                |            |                 |               |                   |
|--------------------------------|-------------------------------------------------------------------------------------------------------------------------------------------------|----------------|------------|-----------------|---------------|-------------------|
| Ítem                           | Las siguientes preguntas están destinadas a obtener información acerca de tu percepción del apoyo y los recursos del plan de estudios del grado | Muy de acuerdo | De acuerdo | Algo de Acuerdo | En Desacuerdo | Muy en desacuerdo |
| 44                             | El personal de administración y servicios se interesa por el alumnado y es útil                                                                 |                |            |                 |               |                   |
| 45                             | El personal de administración y servicios se comporta de manera profesional                                                                     |                |            |                 |               |                   |
| 46                             | El material de los talleres de simulación y de las salas de ordenadores está fácilmente disponible.                                             |                |            |                 |               |                   |
| 47                             | Los talleres de simulación y las salas de ordenadores están bien equipadas, dotadas de personal adecuado y son fácilmente accesibles            |                |            |                 |               |                   |
| 48                             | Las instalaciones (aulas, talleres de simulación y salas de informática) facilitan mi aprendizaje                                               |                |            |                 |               |                   |
